# Supplementary material for: Expression Analysis of Five Different Long Non-Coding Ribonucleic Acids in Nonsmall-Cell Lung Carcinoma Tumor and Tumor-Derived Exosomes
Source: MDPI journal article supplement (doi:10.3390/diagnostics12123209), 2022-12-17
Supplement: s1 [file s1]

**Table S1.** The sequences of primers for 5 lncRNAs.

| Gene Name     | Primer & Probe Sequence              | length | Product length |
|---------------|--------------------------------------|--------|----------------|
| <i>GHSROS</i> | F: TGTCGTGGGTGCCTCGCT                | 18     | 116            |
|               | R: ATAAATATCGCCCTACGTGG              | 20     |                |
|               | FAM-AAGCAAACCGTGAAAATGCTGG- TAMRA    | 22     |                |
| HMLincRNA717  | F: TGGATGCTTACAAAGGACTGG             | 21     | 173            |
|               | R: CTGCAATTACGGAAAGAGCTG             | 21     |                |
|               | FAM- CGTTGCTCCTCAACCCGG- TAMRA       | 19     |                |
| HNF1A-AS1     | F: CAAGAAATGGTGGCTATGA               | 19     | 184            |
|               | R: TGGACTGAAGGACAAGGGT               | 19     |                |
|               | FAM- TCAGAGCTCTTTGGCAATC- TAMRA      | 20     |                |
| HOTAIR        | F: ACCTCTGTCTGTGAGTGCC               | 19     | 128            |
|               | R: AGAGGAGGGAAGAGAGCGCC              | 20     |                |
|               | FAM- ACCCAAGCTAGAGTGCAGTGGCCT- TAMRA | 24     |                |
| LINCRNA-p21   | F: CCCGGGCTTGTCTTTTGTT               | 19     | 160            |
|               | R: GAGTGGGTGGCTCACTCTTCTG            | 22     |                |
|               | FAM- ATGCGGCCTTGCAGG-TAMRA           | 15     |                |
| HPRT1         | F: AGCCTAAGATGAGAGTTC                | 18     | 88             |
|               | R: CACAGAACTAGAACATTGATA             | 21     |                |
|               | FAM- CATCTGGAGTCCTATTGACATCGC -TAMRA | 24     |                |
